# Supplementary material for: Self-cleaning formulations of mixed metal oxide-silver micro-nano structures with spiky coronae as antimicrobial coatings for fabrics and surfaces
Source: Royal Society of Chemistry journal article supplement (doi:10.1039/d3ma00951c), 2024-01-01
Supplement: d3ma00951c1.pdf [file d3ma00951c1.pdf]

## Supplementary Information

### Self-cleaning formulation of mixed metal oxide-silver micro-nano structures with spiky corona as antimicrobial coatings for fabrics and surfaces

Ramya Prabhu B.<sup>1,†</sup> Bhamy Maithry Shenoy<sup>2,†</sup> Manish Verma<sup>1</sup>, Soumyashant Nayak<sup>3</sup>, Gopalkrishna Hegde<sup>2</sup>, Neena S. John<sup>1\*</sup>

<sup>1</sup>Centre for Nano and Soft Matter Sciences, Shivanapura, Bengaluru 562162, India

<sup>2</sup>Indian Institute of Science, Bengaluru 560012

<sup>3</sup>Theoretical Statistics and Mathematics Unit, Indian Statistical Institute, Bengaluru 560059, India

<sup>†</sup>Equal Contribution

Email: [jsneena@cens.res.in](mailto:jsneena@cens.res.in)

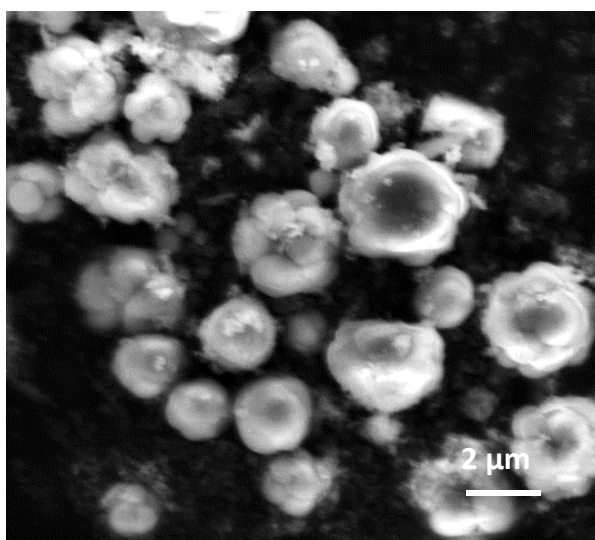

**Figure S1.** FESEM images of spherical MMO-Ag.

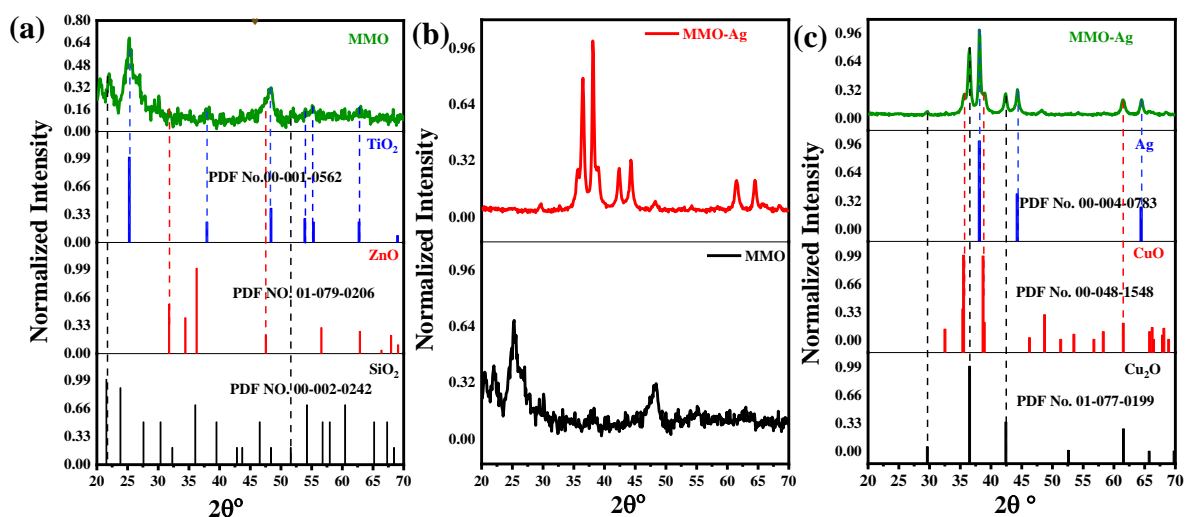

**Figure S2.** X-ray diffractograms (a) spiky MMO (b) comparison of MMO-Ag and MMO (c) MMO-Ag

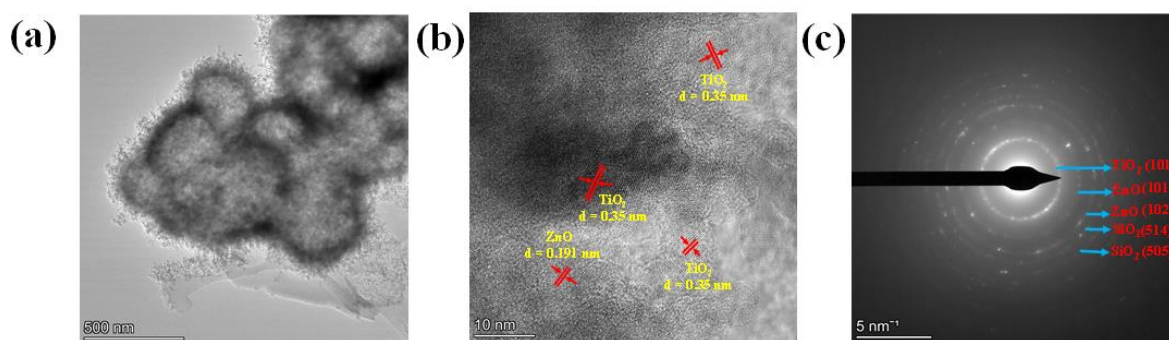

**Figure S3.** Additional TEM images (a) spiky MMO (b) HRTEM analysis of MMO (c) SAED analysis of MMO

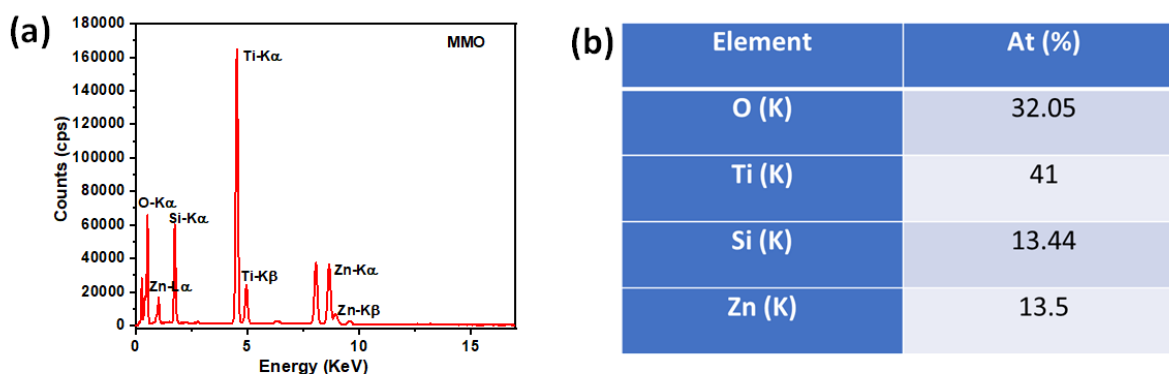

**Figure S4.** EDS of MMO obtained from TEM

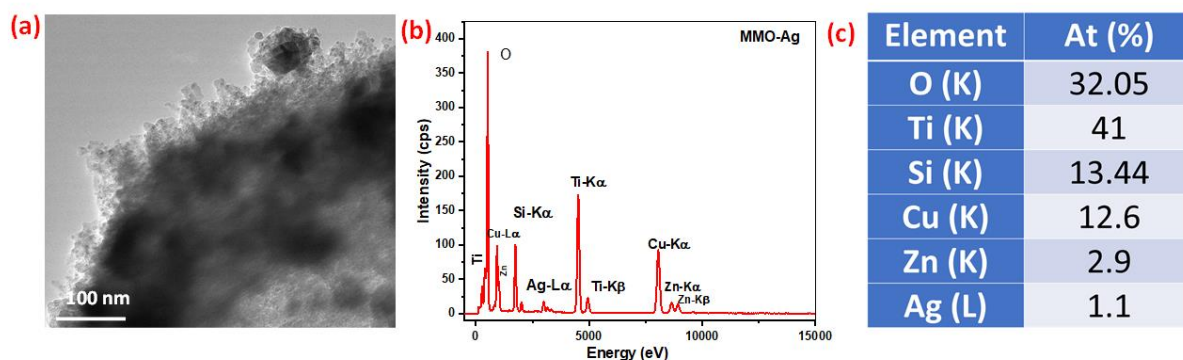

**Figure S5.** a) Magnified TEM image of MMO-Ag (b,c) EDS of MMO-Ag obtained from TEM XPS Study

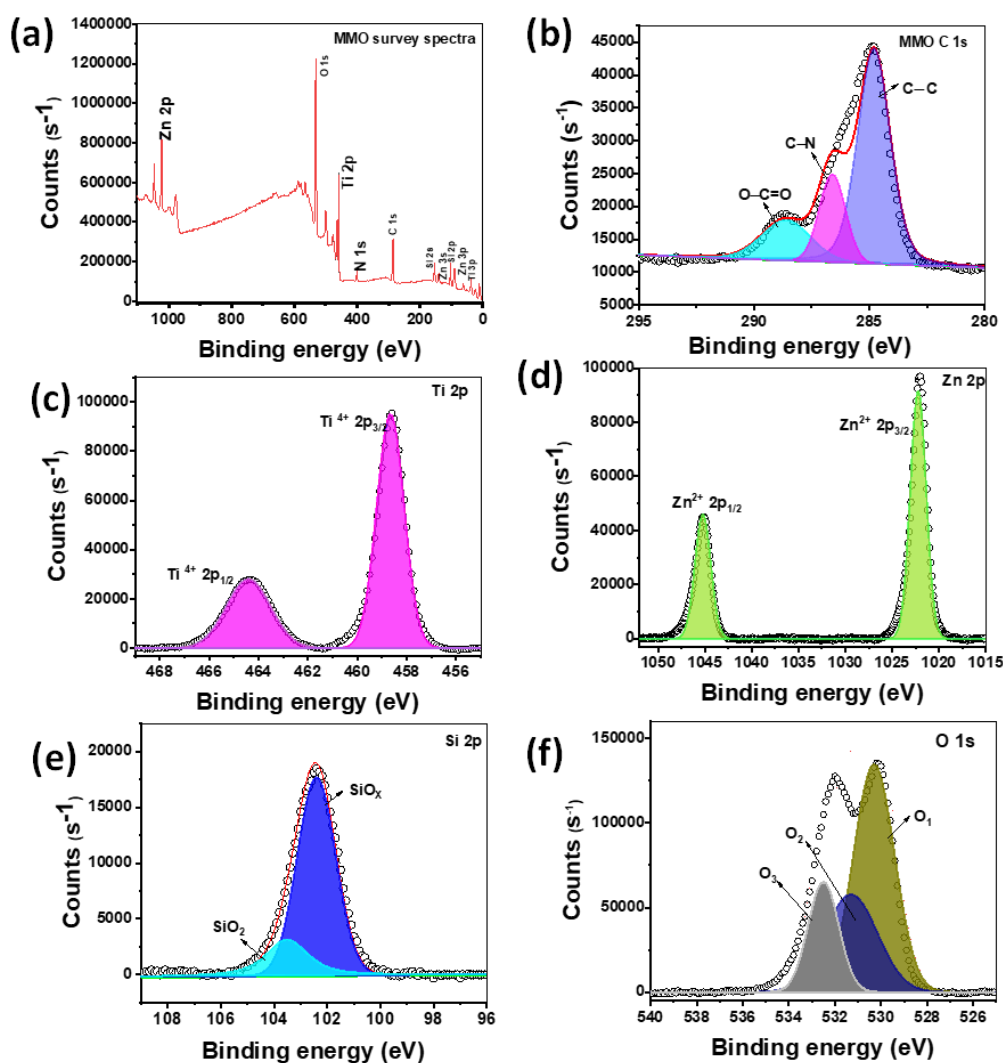

**Figure S6.** XPS spectra of MMO (a) XPS survey spectra of MMO. High-resolution XPS of (b) C 1s (c) Ti 2p (d) Zn 2p (e) Si 2p (f) O 1s.

The surface oxidation states of various elements in the MMO have been studied using XPS, as shown in Figure S6. The XPS survey scan (Figure S6(a)) reveals the presence of signatures of Ti (2p, 3p), Si (2s,2p), Zn (2p,3s, 3p), N (1s), C (1s) and O (1s). The deconvoluted high-resolution C1s spectra are presented in Figure S6(b), in which the peaks observed at 284.8 eV correspond to  $sp^2$  and  $sp^3$  carbon. The peaks around 286 eV and 288.4 eV can be attributed to C-N (of HMTA) and O-C=O (of oxalate), respectively [Md. Nizam Uddin et al., *Thin Solid Films*, **2013**, 548, 27-33; B. Kommula et al., *Part. Part. Syst. Charact.* **2023**, 2300118]. The Ti 2p peaks can be deconvoluted and assigned to  $2p_{3/2}$  (458.6 eV) and  $2p_{1/2}$  (464.4 eV) of  $Ti^{4+}$  oxidation states arising from  $TiO_2$  (Fig. S6 (c)) [S.C. Ray et al., *J. Phys. Chem. C* **2022**, 126 (20), 8947]. The Zn 2p spectra reveal the presence of  $Zn^{2+} 2p_{3/2}$  and  $Zn^{2+} 2p_{1/2}$  peaks centered at 1022.1 eV and 1045.1 eV, respectively as shown in Fig.S6(d) corresponding to ZnO in MMO [D. L.T. Nguyen et al., *ACS Sustain. Chem. Eng.* **2017**, 5 (12), 11377–11386]. The deconvolution of Si 2p spectra reveals the presence of low valent Si in nonstoichiometric  $SiO_x$  (102.4 eV) and  $Si^{4+}$  in  $SiO_2$  (103.5 eV) (Figure S6(e) [R. Alfonsetti et al., *Appl. Surf. Sci.* 1993, 70–71, 222; *Surf. Interface Anal.* 1994, 22 (1–12), 89, L. Sun et al., *ACS Appl. Mater. Interfaces* **2017**, 9 (46), 40386]. The O 1s spectra is deconvoluted into three peaks at 530.2 eV ( $O_1$ ) corresponding to the oxide ion ( $O^{2-}$ ) forming the metal-oxygen bond, 531.3 eV ( $O_2$ ) corresponding to oxygen-deficient species and 532.5 eV ( $O_3$ ), attributed to the surface hydroxyl groups (Figure S6(f)) [R. Prabhu B., et al., *Nanotechnology* **2023**, 34 (21), 215701]. The relative percentage intensity of  $O_1$ ,  $O_2$ ,  $O_3$  species is 52.25%, 28.85 %, and 18.89 %. From the XPS analysis, it is evident that the synthesized material contains an adequate amount of defective oxygen.

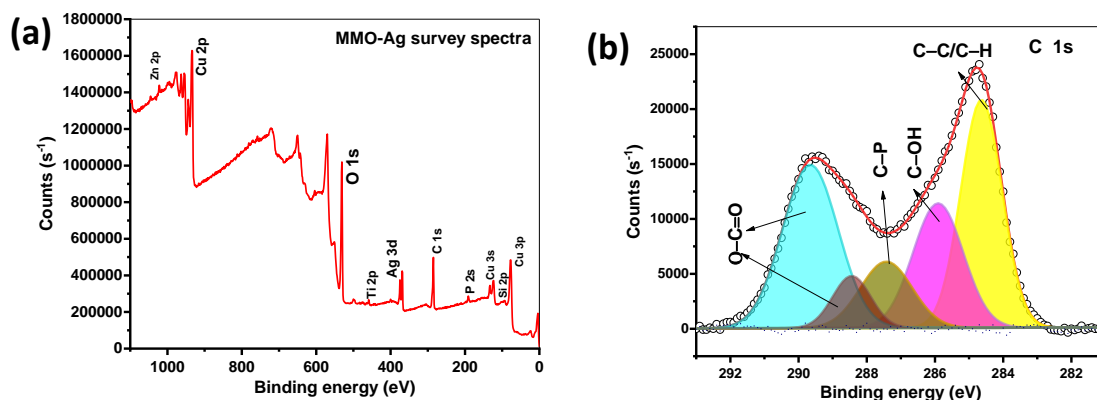

**Figure S7.** (a) XPS survey spectra of MMO-Ag (b) High-resolution XPS of C1s

The XPS survey scan of MMO-Ag (Figure S7(a)) reveals the presence of major transitions due to Ti (2p, 3p), Si (2s,2p), Zn (2p,3s, 3p), N (1s), C (1s) and O (1s) similar to MMO. In addition, signals from P (2s), Cu (2p,3s,3p), Ag(3d) are also detected in MMO-Ag as expected due to the presence of CuO, Ag and THPC.

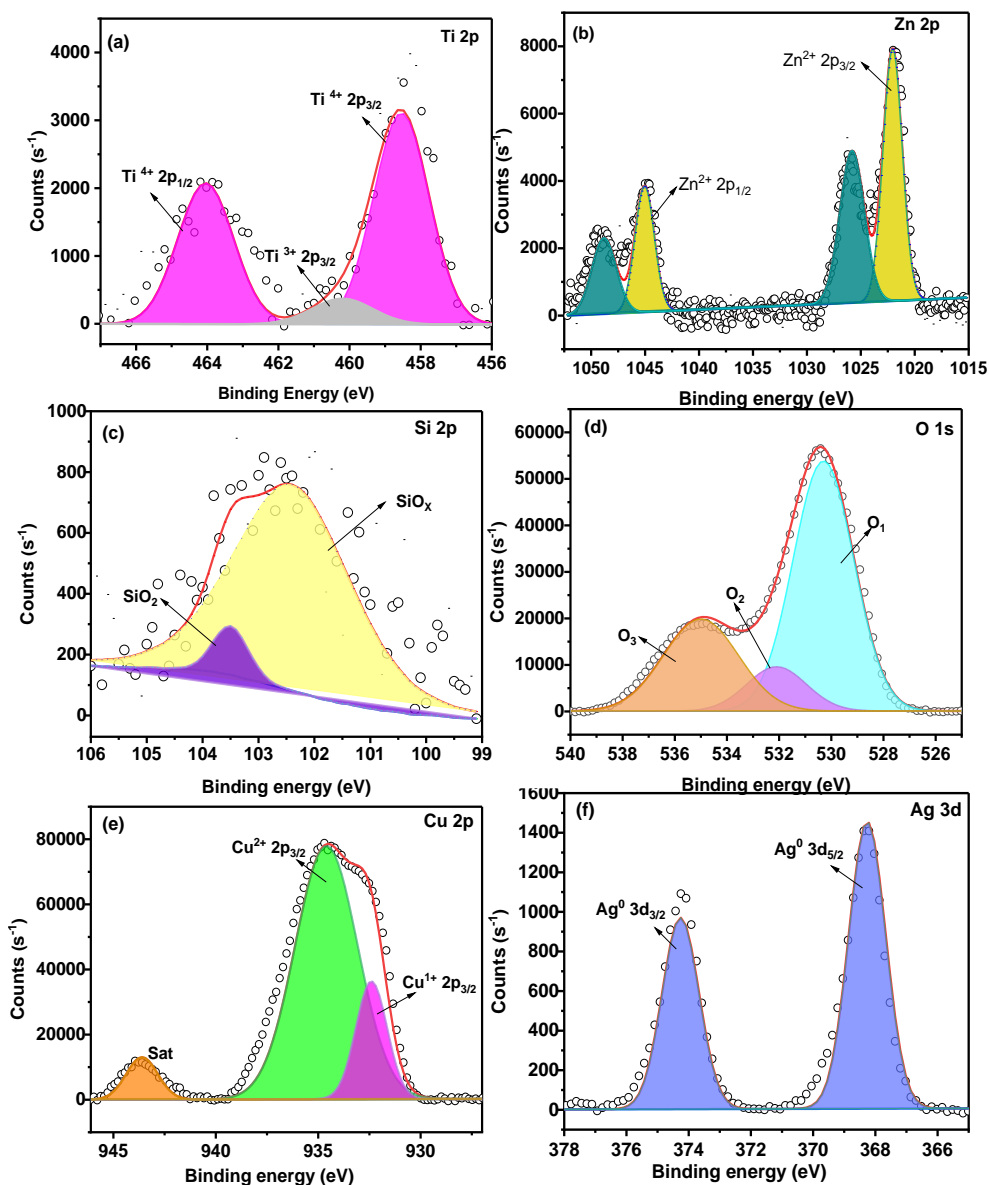

**Figure S8.** XPS spectra of MMO-Ag (after deposition of CuO and Ag on MMO). High-resolution XPS of (a) Ti 2p, (b) Zn 2p, (c) Si 2p, (d) O 1s, (e) Cu 2p, (f) Ag 3d.

The deconvoluted high-resolution C1s spectra (Fig. S7(b)) exhibits peaks at 284.6 eV that correspond to  $sp^2/sp^3$  C-C and C-H. The peaks around 285.9 eV, 287.4 eV, 288.4 eV and 289.6 eV can be attributed to C-N (HMTA)/C-OH (THPC), C-P/C-O-C (oxalate, THPC), and C=O/O-C=O groups (hydrolysed and oxidised THPC products), respectively [T.R.

The Ti 2p peaks of MMO-Ag can be deconvoluted and assigned to 2p<sub>3/2</sub> (458.5 eV) and 2p<sub>1/2</sub> (463.9 eV) corresponding to Ti<sup>4+</sup> oxidation state of TiO<sub>2</sub> (Fig. S8(a)). In addition to these peaks, a weak peak is observed at 460.1 eV that can be assigned to Ti<sup>3+</sup> due to titanium suboxide [B. Bharti et al., *Sci. Rep.* 2016, 6 (1), 32355]. The alkaline treatment followed by chemical reduction would have resulted in the suboxide formation. In the case of Zn 2p spectra, in addition to the presence of Zn<sup>2+</sup> 2p<sub>3/2</sub> and 2p<sub>1/2</sub> peaks at 1022.0 eV and 1045.0 eV, respectively as shown in Fig. S8(b), peaks at a higher binding energy, 1025.8 eV and 1048.8 eV are also observed. This can be associated with the coordination of Zn with the surfactants such as hydrolysed THPC [L.G. Mar et al., *Thin Solid Films*, 1993, 223, 341]. Similarly, as in the case of MMO the deconvolution of Si 2p spectra shows the presence of majorly low valent Si from nonstoichiometric SiO<sub>x</sub> (102.4 eV) and SiO<sub>2</sub> (103.5 eV), respectively (Fig. S8(c)). The O 1s peak of MMO-Ag nanoformulations can be deconvoluted into three peaks, as depicted in Figure S8(d). The O<sub>1</sub> (lattice oxygen) at a lower binding energy value of 530.3 eV, O<sub>2</sub> around 532.0 eV due to the hydrated species a broader peak at 534.9 eV (O<sub>3</sub>) is due to the H<sub>2</sub>O molecules. Figure S8 (e) shows the deconvoluted spectra of Cu 2p. The Cu 2p<sub>3/2</sub> component can be deconvoluted into peaks contributed by Cu<sup>1+</sup> and Cu<sup>2+</sup> states, located at 932.3 and 934.5 eV. This clearly shows the presence of Cu<sub>2</sub>O and CuO and agrees with the XRD results. [D. A. Svintsitskiy, *J. Phys. Chem. C* 2013, 117, 28, 14588] The satellite peak with a binding energy of 943.6 eV is also observed in the spectra. The HRXPS of Ag 3d indicates the presence of elemental silver (Ag<sup>0</sup>) at 368.2 eV (3d<sub>5/2</sub>) and 374.2 eV (3d<sub>3/2</sub>), respectively (Figure S8(f)) [W.W. Bryan et al., *RSC Adv.*, 2016, 6, 68150].

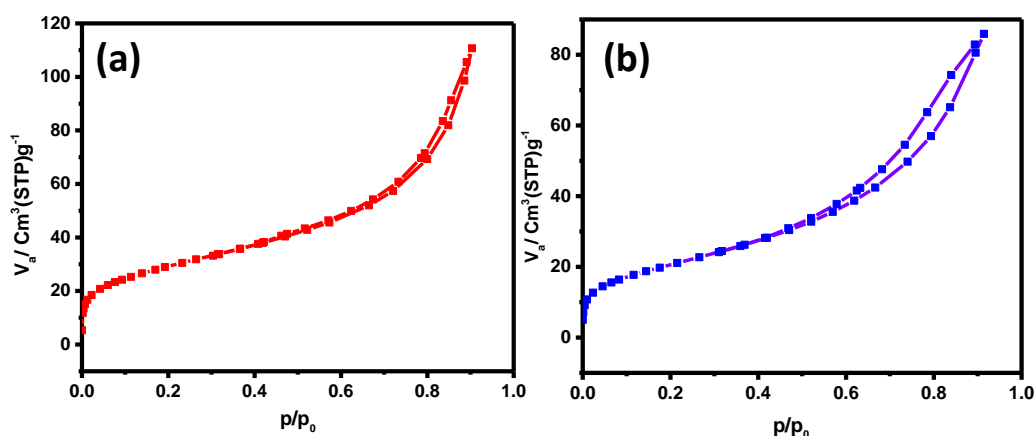

**Figure S9.** BET isotherm and BJH plot, respectively of (a, b) MMO (c, d) MMO-Ag.



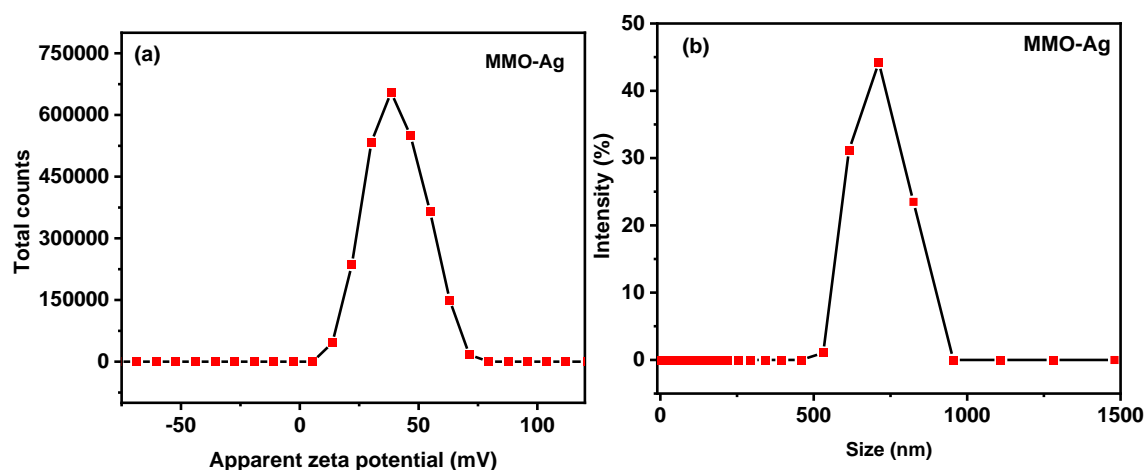

**Figure S10.** (a) Zeta potential plot (b) Average particle size distribution of 1 mg/mL concentration of MMO-Ag in ethanol by DLS.

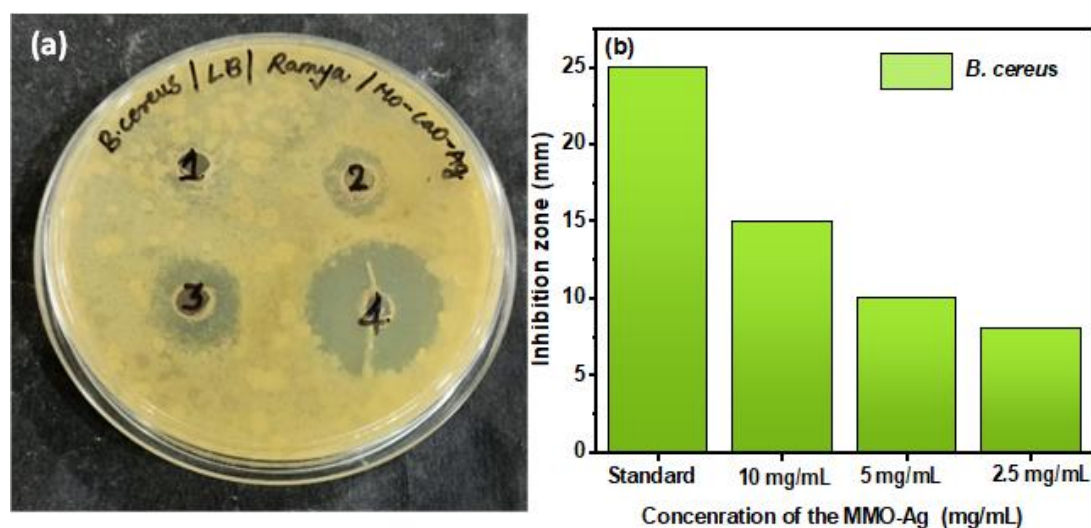

**Figure S11.** Photographs of ZI (a) MMO-Ag against *B. cereus*. (b) Bar diagrams showing ZI for various concentrations of MMO-Ag along with that of the standard antibiotic Ciprofloxacin.

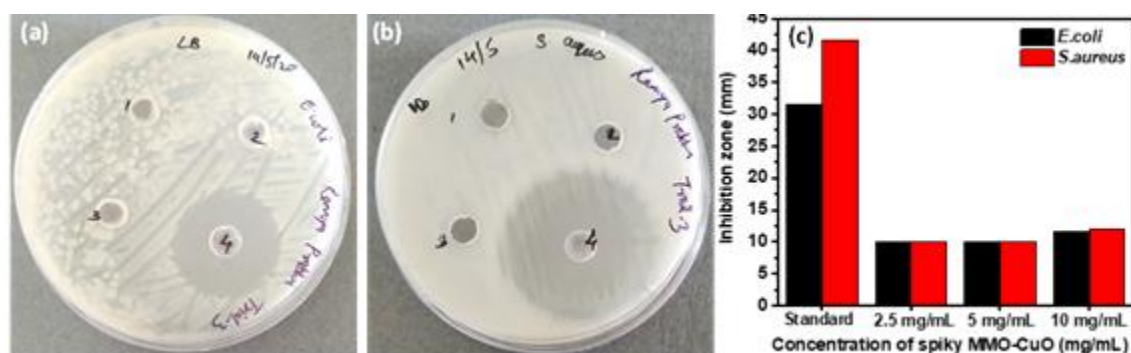

**Figure S12.** Photographs of ZI obtained for various concentrations of spiky MMO-CuO (without Ag) (a) against *E. coli* (b) against *S. aureus* (c) Bar diagrams showing ZI.

The numbers 1, 2, and 3 in the photographs correspond to the loading of 2.5, 5, and 10 mg/mL of the spiky MMO-CuO on the test bacteria, respectively and number 4 corresponds to the standard antibiotic ciprofloxacin. The corresponding inhibition zone values are shown in the bar graph, Figure S12(c). It is observed that spiky MMO-CuO has slightly lesser antimicrobial properties (lesser ZI) compared to the spiky MMO-Ag, but is still active.

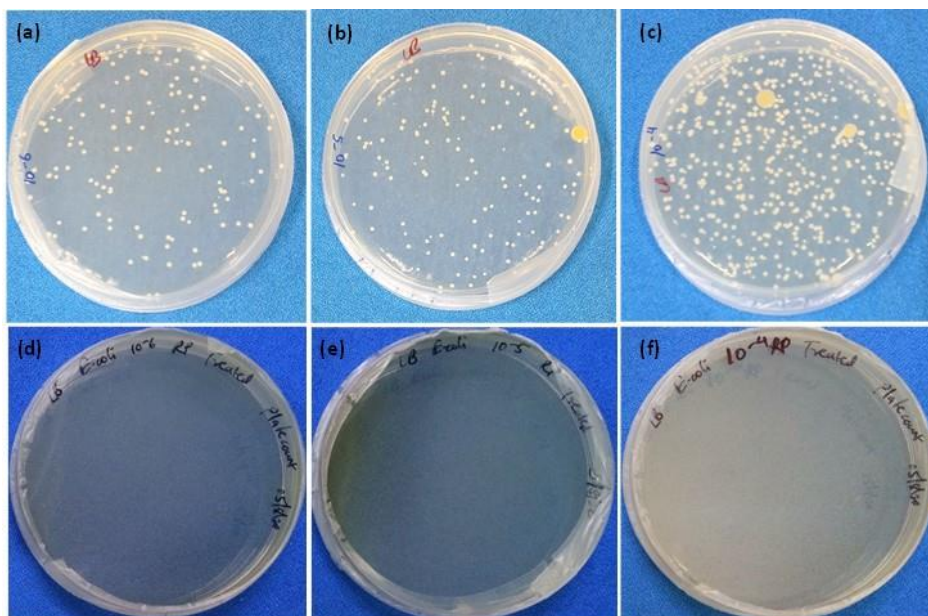

**Figure S13.** Photographs of agar plates incubated with (a-c) *E. coli* of  $8 \times 10^{-6}$ ,  $8 \times 10^{-5}$  and  $8 \times 10^{-4}$  CFU/mL (d-f) treated with 10 mg/mL MMO-Ag.

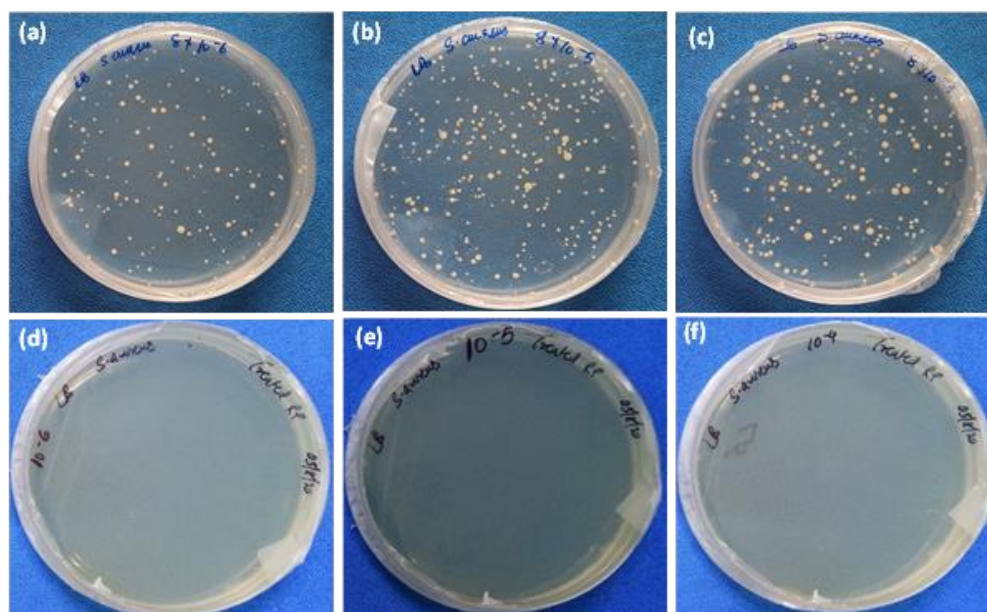

**Figure S14.** Photographs of agar plates incubated with (a-c) *S. aureus* of  $8 \times 10^{-6}$ ,  $8 \times 10^{-5}$  and  $8 \times 10^{-4}$  CFU/mL (d-f) treated with 10 mg/mL MMO-Ag.



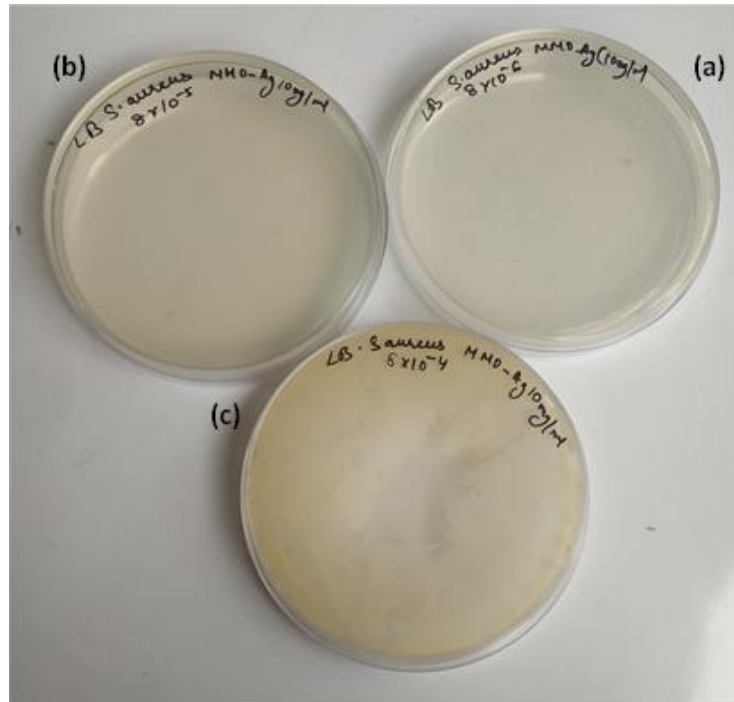

**Figure S15.** Photographs of agar plates incubated with (a-c) *S. aureus* of  $8 \times 10^{-6}$ ,  $8 \times 10^{-5}$ , and  $8 \times 10^{-4}$  CFU/mL treated with 10 mg/mL spherical MMO-Ag.

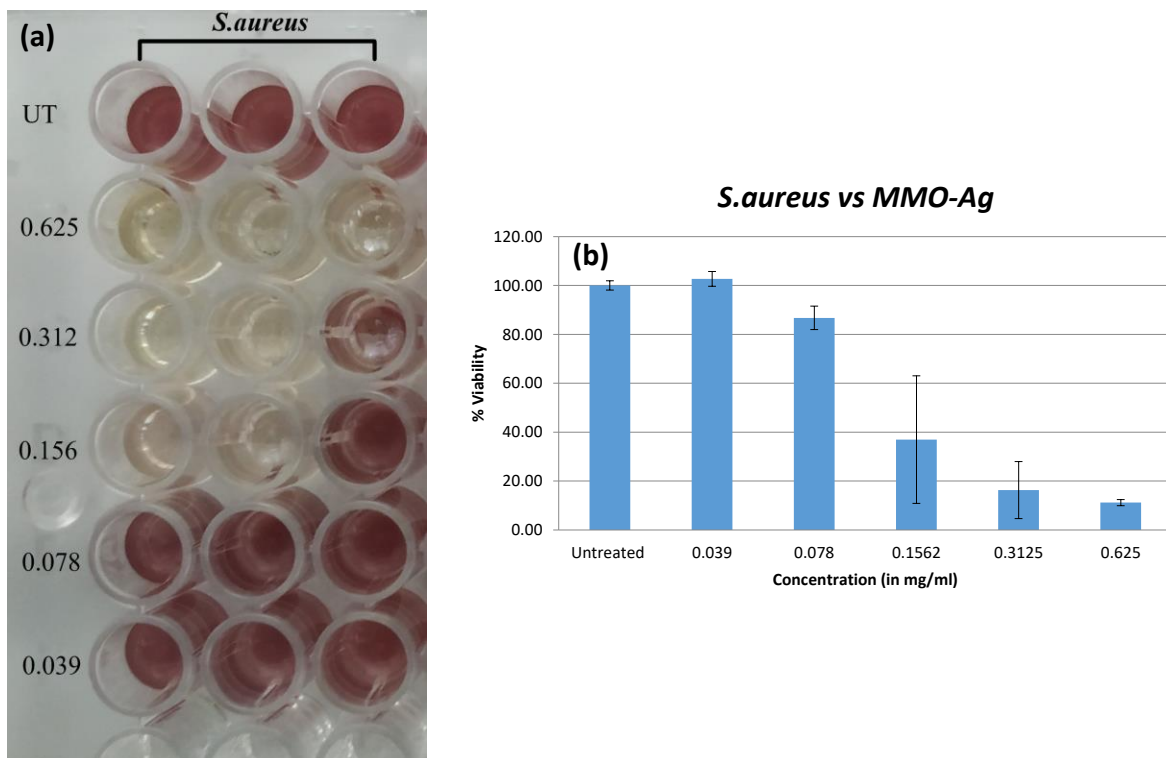

**Figure S16.** Photographs of 96 wells microtitre plate with *S. aureus* bacterial solution treated with various concentrations of (a) MMO-Ag (b) Graph showing percentage viability of *S. aureus* vs. MMO-Ag.

We can observe the untreated *S. aureus* bacteria is well-grown in the media and the red turbidity is observed. That is because the p-iodonitrotetrazolium violet dye which is treated with the microorganism has reduced to form a purple formazan dye. The reduction of the tetrazolium salt is due to the activity of the mitochondria enzyme in the active cells [J.N. Eloff *et al.*, *Planta Med.* 1998, 64, 711]. The intensity of the formazan compound can be measured using absorbance where the intensity of the compound is directly proportional to the number of metabolically active cells. From these microplate's absorbance is recorded at the 600 nm wavelength, and the cell viability is calculated.

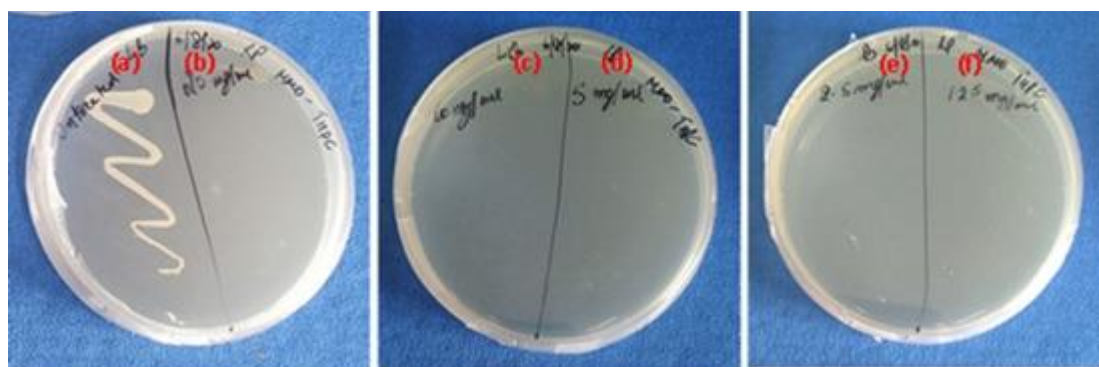

**Figure S17.** Photographs of agar plate with *S. aureus* bacterial solution (a) untreated agar plate (b) treated with 20 mg/mL (c) 10 mg/mL (d) 5 mg/mL (e) 2.5 mg/mL (f) 1.25 mg/mL concentration of the MMO-Ag.

**Table S1. Comparison of antibacterial activity with literature**

| Nanomaterial                      | Size & Shape             | Microbe                                                               | Mode of action                                                                                      | Efficacy against microbes                                                                   | Ref                                              |
|-----------------------------------|--------------------------|-----------------------------------------------------------------------|-----------------------------------------------------------------------------------------------------|---------------------------------------------------------------------------------------------|--------------------------------------------------|
| MMO-Ag                            | ~1.2 $\mu\text{m}$ spiky | Gram-positive and gram-negative bacteria and virus                    | ROS generation, mechano-bactericidal effect, Electrostatic interaction                              | MIC <sub>50</sub> 107 $\mu\text{g/mL}$ - <i>S. aureus</i>                                   | This work                                        |
| CuO-NiO                           | 8–10 nm nanoparticles    | Gram-positive and Gram-negative bacteria                              | electrostatic force of attraction                                                                   | MIC 3.0 mg/mL - <i>S. aureus</i><br>4.9 mg/mL - <i>E. Coli</i>                              | Mater. Res. Exp., 2019, 6(5), 055004.            |
| ZnO nanoparticles in ionic liquid | 64 nm nanoparticles      | Gram-positive bacteria <i>S. epidermidis</i> , Skin specific bacteria | toxic Zn <sup>2+</sup> ions are produced, which in turn help in the production of intracellular ROS | IC <sub>50</sub> 70 $\mu\text{g/mL}$ and IC <sub>90</sub> 105 for <i>S. epidermidis</i>     | ACS Appl. Mater. Interfaces 2018, 10, 18, 15401. |
| CoV <sub>2</sub> O <sub>6</sub>   | 10-200 nm Nanorods       | Gram-positive and Gram-negative bacteria                              | Electrostatic interaction of the Co metals and the membrane                                         | IC <sub>50</sub> 0.43 mg/mL- <i>E. Coli</i><br>0.51 mg/mL <i>Kleb. p</i><br>0.53 mg/mL-MRSA | Ceramics Int., 2018, 44(7), 7716.                |

|                                                                                                                                                            |                                                                                        |                                          |                                                                                                                                       |                                                                                                                           |                                                  |
|------------------------------------------------------------------------------------------------------------------------------------------------------------|----------------------------------------------------------------------------------------|------------------------------------------|---------------------------------------------------------------------------------------------------------------------------------------|---------------------------------------------------------------------------------------------------------------------------|--------------------------------------------------|
|                                                                                                                                                            |                                                                                        |                                          | Oxidative stress in cells and DNA damage                                                                                              | 0.62 mg/mL- <i>S. aureus</i>                                                                                              |                                                  |
| Cellulose/Yttrium oxide                                                                                                                                    | Nanodisc on nanotube                                                                   | Gram-positive and Gram-negative bacteria | photocatalytic disinfection<br>Generation of reactive species                                                                         | ~100% efficacy<br>30 mg/L- <i>E. Coli</i><br>60 mg/L- <i>S. aureus</i>                                                    | Mater. Lett., 2017, 192, 64.                     |
| Silver/Lithium /Vanadium oxide                                                                                                                             | Nanotube Dia 40-50 nm                                                                  | Gram-positive and Gram-negative bacteria | direct action of the nanocomposites on the cell surfaces by generation of ROS                                                         | MIC <sub>50</sub><br>40 µg/mL- <i>B. subtilis</i><br>80 µg/mL- <i>E. Coli</i>                                             | Appl. Microbiol. Biotechnol., 2013, 97(18), 283. |
| mesoporous silica supported SBA/CuO SBA/ZnO CuZnO                                                                                                          | Spherical                                                                              | Gram-positive and Gram-negative bacteria | Release of dissociated metal ions and the release of reactive oxygen species                                                          | 12.5 mg/mL<br>50 mg/mL<br>0.558 mg/mL- <i>E. coli</i><br>3.125 mg/mL<br>12.5 mg/mL<br>0.139 mg/mL- <i>S. aureus</i>       | RSC Adv., 2020,10, 2767.                         |
| RGO-NiO, RGO-AgO, RGO-ZnO                                                                                                                                  | rGO sheets<br>metal oxide<br>spherical nanoparticles                                   | Gram-positive and Gram-negative bacteria | the release of reactive oxygen species                                                                                                | 250 µg/mL<br>250 µg/mL<br>125 µg/mL- <i>E. coli</i><br>125 µg/mL<br>25 µg/mL<br>250 µg/mL- <i>S. aureus</i>               | RSC Adv., 2021,11, 25961.                        |
| CuO<br><br>ZnO                                                                                                                                             | Nanorods<br>Average length 100 nm<br><br>Spherical 10 nm to 35 nm                      | Gram-positive and Gram-negative bacteria | <br><br>the release of reactive oxygen species                                                                                        | 1 mg/mL- <i>E. coli</i><br>0.25 mg/mL<br><i>S. aureus</i><br>0.1 mg/mL- <i>S. aureus</i><br>No inhibition- <i>E. coli</i> | Results in Materials, 2020, 7, 100099            |
| Ag-Sn/SnO <sub>2</sub><br>Ag<br>Sn/SnO <sub>2</sub>                                                                                                        | Particle size 1–18 nm in size.<br>rod type, chain like and interlinked with each other | Gram-negative bacteria                   | Ag/Ag+ enters inside the cell through phagocytosis/endocytosis, then it can damage the DNA and the release of reactive oxygen species | 0.015 µg/mL<br>0.03 µg/mL<br>0.625 µg/mL<br>- <i>A. baumannii</i>                                                         | RSC Adv., 2022, 12, 1105                         |
| α-Fe <sub>2</sub> O <sub>3</sub> /Co <sub>3</sub> O <sub>4</sub><br>(0.1(M)<br>Fe <sub>2</sub> O <sub>3</sub> +<br>0.1(M) Co <sub>3</sub> O <sub>4</sub> ) | Mix of rod shaped and roughly hexagonal shaped nanoparticles                           | Gram-positive and Gram-negative bacteria | Fenton reaction cobalt oxide nanoparticles trigger the production of reactive oxygen species                                          | 90 mg/dL- <i>B. subtilis</i><br>75 mg/dL- <i>S. aureus</i><br>60 mg/dL- <i>S. typhi</i><br>45 mg/dL- <i>E.coli</i>        | Appl. Nanosci. , 2018, 8, 137.                   |
| WO <sub>3</sub> -GO                                                                                                                                        | WO <sub>3</sub> nanospheres on the graphene                                            | Gram-positive and Gram-                  | photocatalytic antibacterial effect                                                                                                   | 2.5-5 mg/mL                                                                                                               | J. Phys. Chem. Solids,                           |

|                                                       |                                                                                                            |                                          |                                                                                                           |                                                                                                           |                                                           |
|-------------------------------------------------------|------------------------------------------------------------------------------------------------------------|------------------------------------------|-----------------------------------------------------------------------------------------------------------|-----------------------------------------------------------------------------------------------------------|-----------------------------------------------------------|
|                                                       | sheet                                                                                                      | negative bacteria                        |                                                                                                           |                                                                                                           | 2018, 116,137.                                            |
| Li-doped MgO                                          | thin sheets                                                                                                | Gram-positive and Gram-negative bacteria | Generation of holes and free electrons by defect rich MgO mechanical damage by sheet morphology           | 600 µg/mL-against <i>E. coli</i> and <i>S. aureus</i>                                                     | Powder Tech., 2020, 371, 130.                             |
| ZnO @ rattle-type silica nanoparticles (ZnO@SN)       | Silica has inner hollow cavity of 150 nm size and a rough shell studded with many 4-6 nm ZnO nanoparticles | Gram-negative bacteria                   | ROS from ZnO particles                                                                                    | 6.25 µg/mL methicillin-resistant <i>Staphylococcus aureus</i>                                             | Sci. Bull. 2017, 62, 1207.                                |
| Ag/CuO 5%                                             | Ag nanoparticles CuO porous open channel                                                                   | Gram-positive and Gram-negative bacteria | ROS                                                                                                       | 30 µg/mL- <i>E. coli</i><br>30 µg/mL- <i>K. pneumoniae</i><br>20 µg/mL- <i>S. aureus</i>                  | Colloids Surf A, 2019, 580, 123732                        |
| Ag@MgO                                                | Embedded-layered coreshell structure with 3-10 nm size                                                     | Gram-positive and Gram-negative bacteria | Release of Ag <sup>+</sup> and Mg <sup>2+</sup> ions as well as the production of reactive oxygen species | 15 µg/mL- <i>E. coli</i><br>20 µg/mL- <i>S. aureus</i>                                                    | Photodiagnosis and Photodynamic Therapy, 2021, 33, 102153 |
| Nanostructured Ti surface                             | Nanowire/Nano sheet clusters on surface with 23 nm pyramidal tip                                           | Gram-positive and Gram-negative bacteria | Mechanobactericidal effect                                                                                | bactericidal efficiency of 98.6 ± 1.23% against <i>E. coli</i> and 69.82 ± 2.79% against <i>S. aureus</i> | ACS Biomater. Sci. Eng. 2021, 7, 2268                     |
| High aspect ratio vertically aligned carbon nanotubes | 100-3000 aspect ratio CNTs                                                                                 | Gram-positive and Gram-negative bacteria | Mechanobactericidal effect                                                                                | bactericidal rates of 99.3% for <i>P. aeruginosa</i> and 84.9% for <i>S. aureus</i>                       | ACS Nano 2018, 12, 7, 6657                                |

**Table S2.** Antibacterial activity of meltblown fabric coated with nanoformulation

| Area of the zone of inhibition in (mm <sup>2</sup> )<br>Diameter of plate – 90 mm |        |                                           |                                               |
|-----------------------------------------------------------------------------------|--------|-------------------------------------------|-----------------------------------------------|
| Microorganism                                                                     | Sample | Area of textile sample (mm <sup>2</sup> ) | Area of Zone of inhibition (mm <sup>2</sup> ) |
| <i>E.coli</i>                                                                     | MMO-Ag | 190                                       | 273                                           |
|                                                                                   |        | 95                                        | 200                                           |
| <i>S. aureus</i>                                                                  | MMO-Ag | 176                                       | 300                                           |
|                                                                                   |        | 189                                       | 325                                           |

**Table S3.** Antiviral testing against bacteriophage virus

| Sample Identification                        | Test organism<br>MS2 Bacteriophage |      |                               |      | Log reduction*<br>* of virus at 2h | %e reduction*<br>**of virus at 2h | MS2 Bacteriophage              |      | Log reduction of virus at 24 h | %reduction of virus at 24 h |
|----------------------------------------------|------------------------------------|------|-------------------------------|------|------------------------------------|-----------------------------------|--------------------------------|------|--------------------------------|-----------------------------|
|                                              | Average PFU/carrier at 0 hours (B) |      | Average PFU/carrier at 2 h(A) |      |                                    |                                   | Average PFU/carrier at 24 h(A) |      |                                |                             |
|                                              | PFU*                               | log  | PFU                           | log  |                                    |                                   | PFU                            | log  |                                |                             |
| Nonwoven fabric(coated with nanoformulation) | 7.1×10 <sup>4</sup>                | 4.85 | 5.60×10 <sup>2</sup>          | 2.74 | 2.11                               | 99.21                             | 4.00×10 <sup>3</sup>           | 3.60 | 1.25                           | 94.36                       |
| Lab control(unreated nonwoven fabric)        |                                    |      | 9.20×10 <sup>4</sup>          | 4.96 | 4.96                               | 0.00                              | 9.60×10 <sup>4</sup>           | 4.98 | 0.00                           | 0.00                        |

\*PFU: Plaque Forming Unit = No. of Microorganisms

\*\* Log reduction Log (B/A) Percentage

\*\*\* reduction = (B – A/ B) x 100; where B is the number of viable test microorganisms on the control carriers immediately after inoculation and A Number of viable test microorganisms on the test carriers after the contact time.

### Cytotoxicity Assay

The cytotoxicity of the MMO-Ag is evaluated by the Cytotoxicity Assay Method. The assay is done in a 96-well plate format in 3 wells for the sample. 1x10<sup>4</sup> VeroE6 cells were plated per well and incubated at 37 °C overnight for the monolayer formation. The next day, cells were incubated with the MMO-Ag at 10 mg/mL, 1 mg/mL, and 0.5 mg/mL concentration. The cells without the MMO-Ag were the control. 24 and 48 hours later, cells were stained with Hoechst 33342 and Sytox orange dye. Images were taken at 10X magnification, 16 images per well, which covers 90% of the well area using Image Xpress Micro confocal (Molecular Devices). Hoechst 33342 nucleic acid stain is a popular cell-permeant nuclear counterstain that emits blue fluorescence when bound to dsDNA. It stains all the live and dead cells. Sytox orange dye stains nucleic acids in cells with compromised membranes. This stain is an indicator of cell death. First, the software will count the total number of cells in the Hoechst image. In the Sytox image, it will count, among Hoechst positive cells, how many cells are positive for Sytox. From the below results, we can conclude that MMO-Ag at 1 mg/mL and 0.5 mg/mL is not cytotoxic on VeroE6 cells.



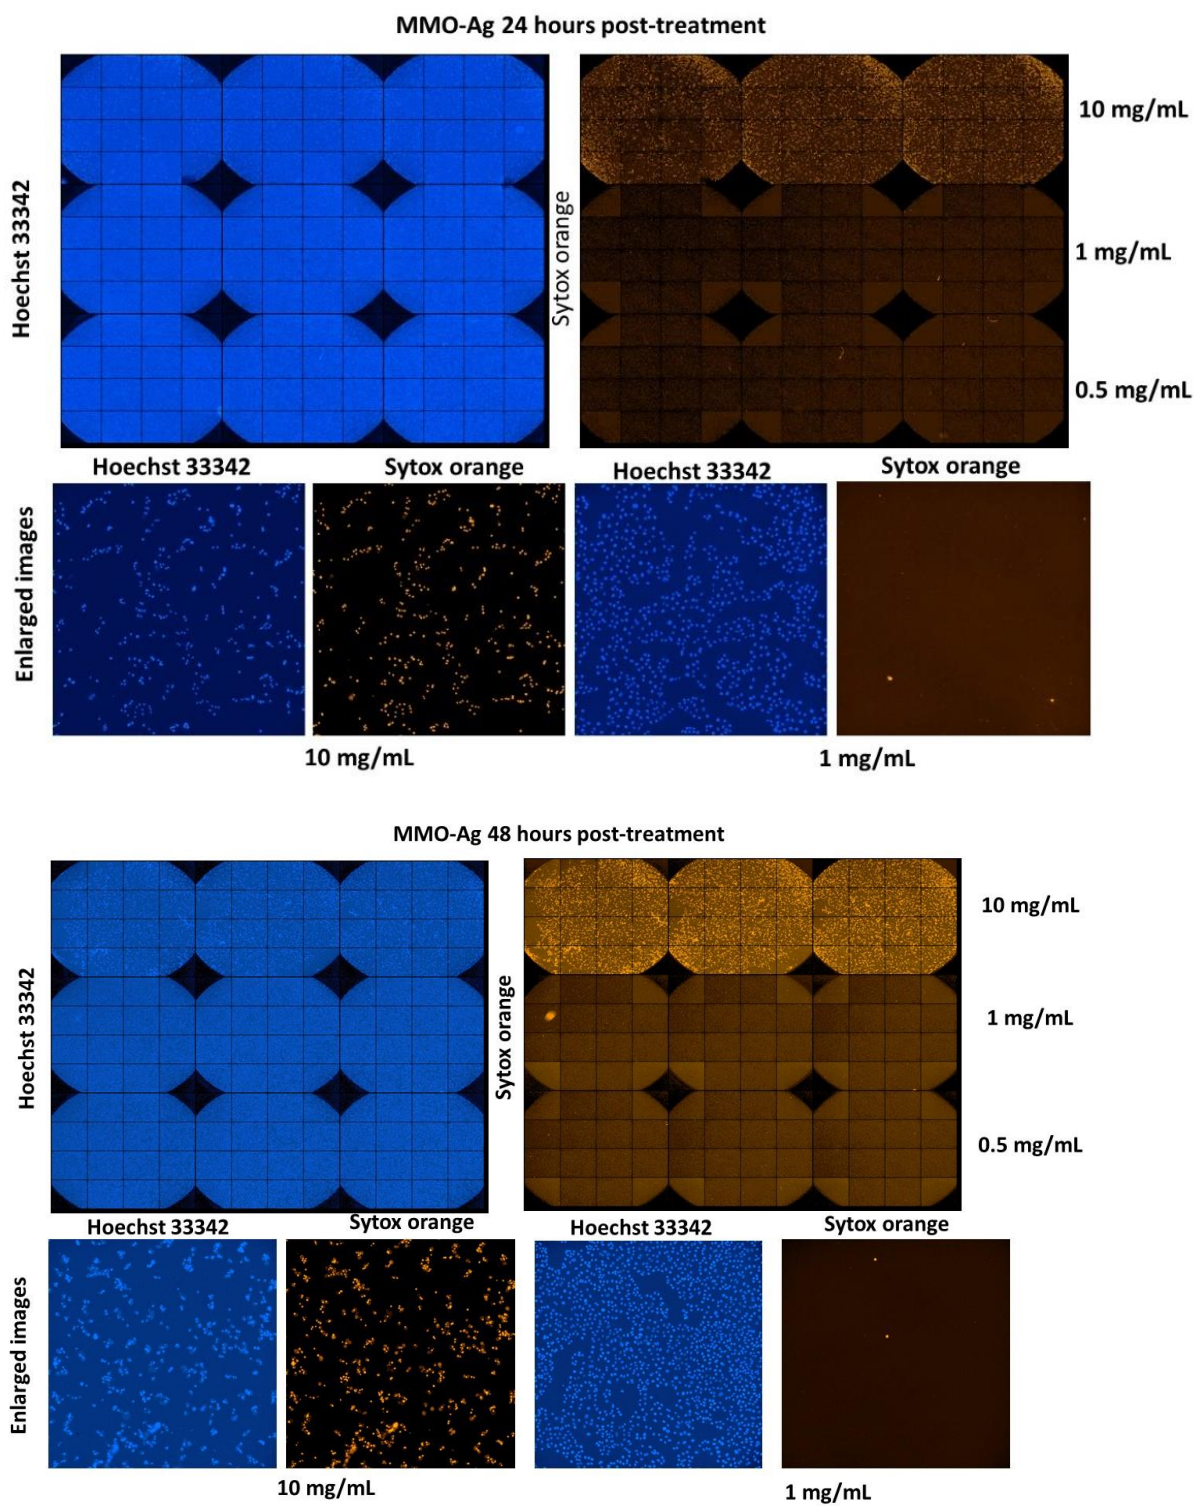

**Figure S18.** (a) MMO-Ag 24 hours post-treatment (b) MMO-Ag-48 hours post-treatment

**Table S4.** Reusability: The antibacterial activity of meltblown fabric coated with nanoformulation after various external treatments against *S. aureus* bacteria

| Area of the zone of inhibition in millimetres <sup>2</sup> (mm) <sup>2</sup><br>Diameter of plate - 90mm |                         |                                           |                                              |
|----------------------------------------------------------------------------------------------------------|-------------------------|-------------------------------------------|----------------------------------------------|
| Microorganism                                                                                            | Treatment method        | Area of textile sample (mm <sup>2</sup> ) | Area of Zone of inhibition(mm <sup>2</sup> ) |
| <i>S. aureus</i>                                                                                         | UV treatment for 30 min | 12                                        | 60                                           |
|                                                                                                          |                         | 15                                        | 90                                           |
|                                                                                                          |                         | 16                                        | 81                                           |
|                                                                                                          | Exposure of Sunlight 3h | 16                                        | 420                                          |
|                                                                                                          |                         | 12                                        | 380                                          |
|                                                                                                          |                         | 25                                        | 441                                          |
|                                                                                                          | Heating at 85°C         | 8                                         | 90                                           |
|                                                                                                          |                         | 16                                        | 110                                          |
|                                                                                                          |                         | 12                                        | 100                                          |

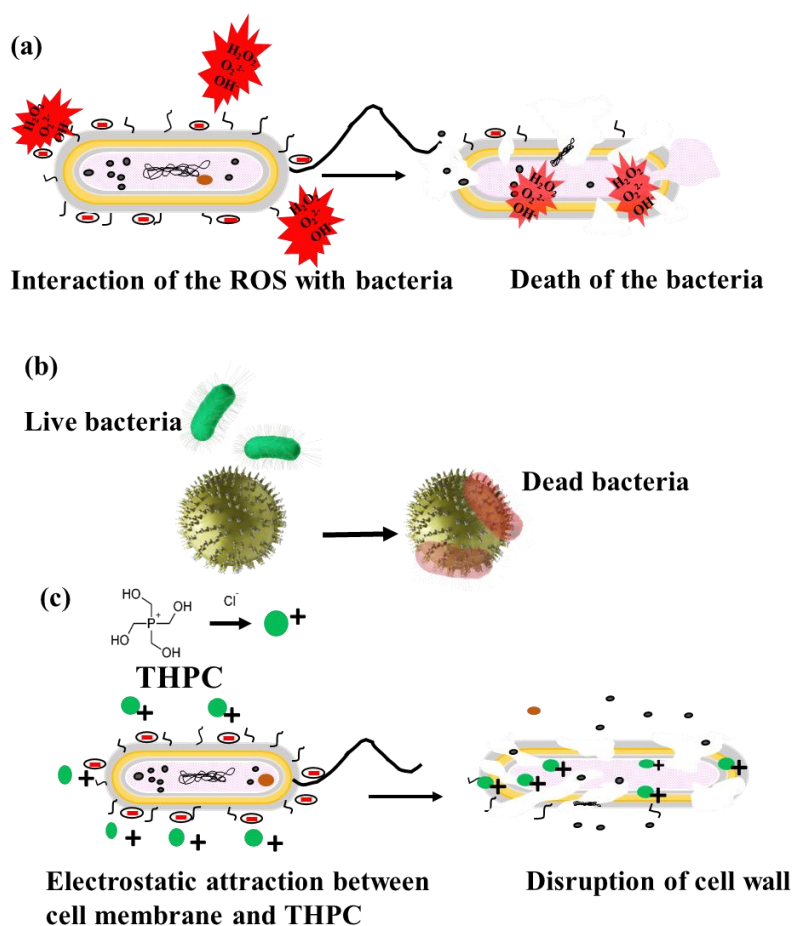

**Figure S19.** Schematic of the plausible mechanism of antimicrobial action of MMO-Ag. (a) Effect of ROS (b) Mechano-bactericidal effect (c) Electrostatic interaction of THPC with the bacterial cell membrane.

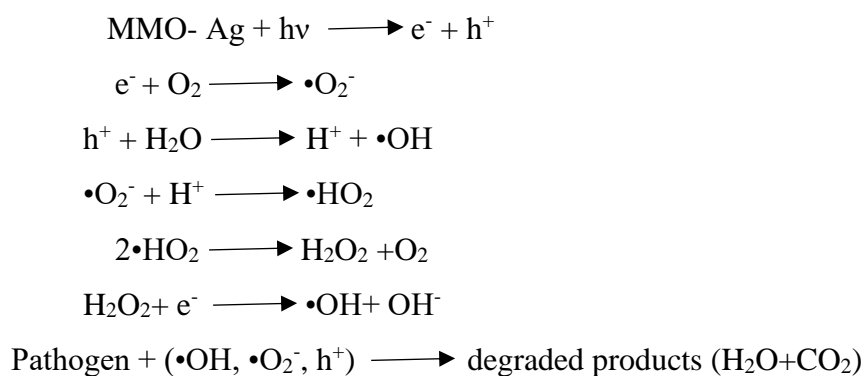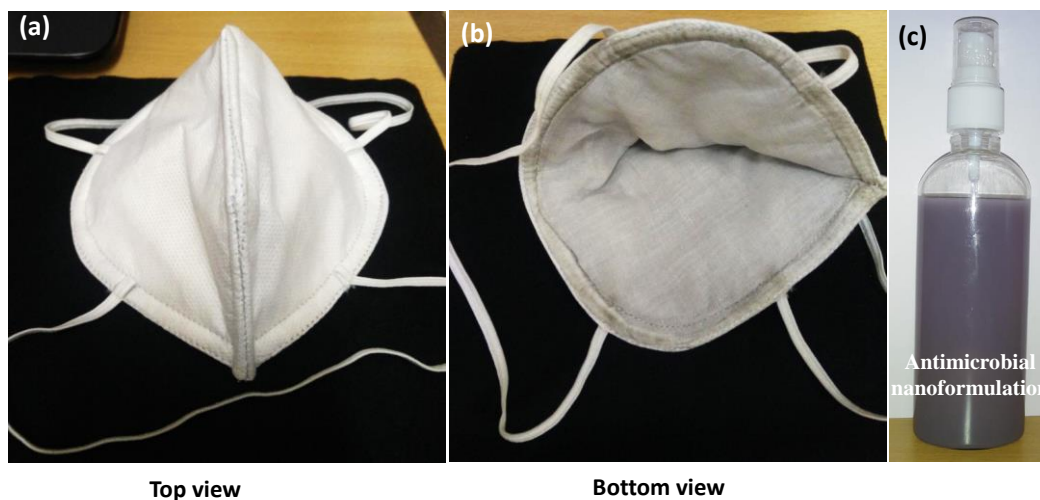

**Figure S20.** (a) Top view (b) Bottom view of the antimicrobial mask (c) Antimicrobial nanoformulation.

**Table S5.** Bacterial filtration efficiency results

| Sample identification                    | Average Bacterial Count | BFE (%) |
|------------------------------------------|-------------------------|---------|
| Mask sample coated with nanoformulation  | 20                      | 99.35   |
| Positive control (plain nonwoven fabric) | $3.10 \times 10^3$      | N. A    |

**Table S6.** Particle filtration efficiency of developed face mask at 0.3 micron

|                                                  |                          |
|--------------------------------------------------|--------------------------|
| Particulate filtration efficiency at 0.3 microns | Nanomaterial coated mask |
| Percentage                                       | 99.67                    |

Sample tested at: R.H.65% +/-2% and Temp.21°C +/- 1°C
